# Supplementary material
Source: publisher site journal article supplement (https://www.dovepress.com/article/439656)
Supplement: Supplementary file 1 [file get_supplementary_file.php]

**Supplemental figure 1**


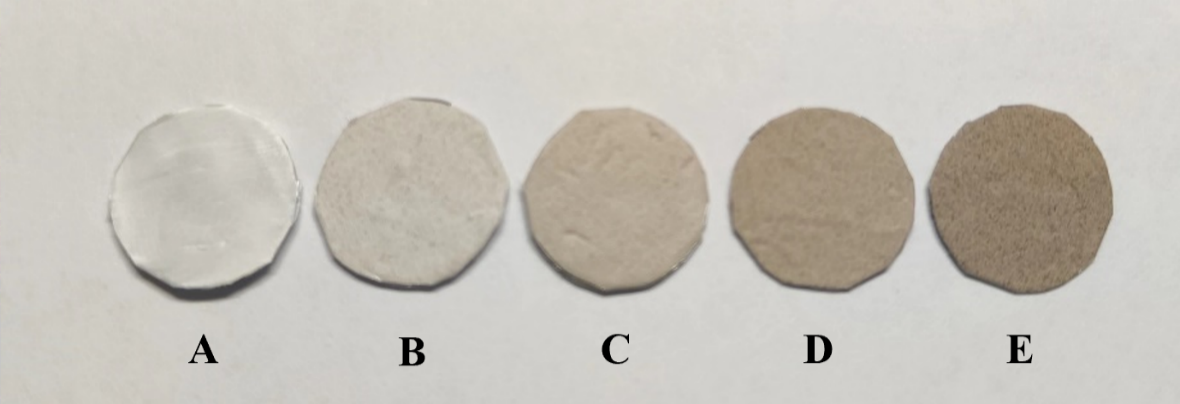


**Supplemental figure 1.** GO/PCL scaffold at concentration of (A) 0%, (B) 0.1%, (C) 0.3%, (D) 0.5%, (E) 1.0%.

**Abbreviations:** GO, Graphene oxide; PCL, Polycaprolactone.

**Supplemental figure 2**


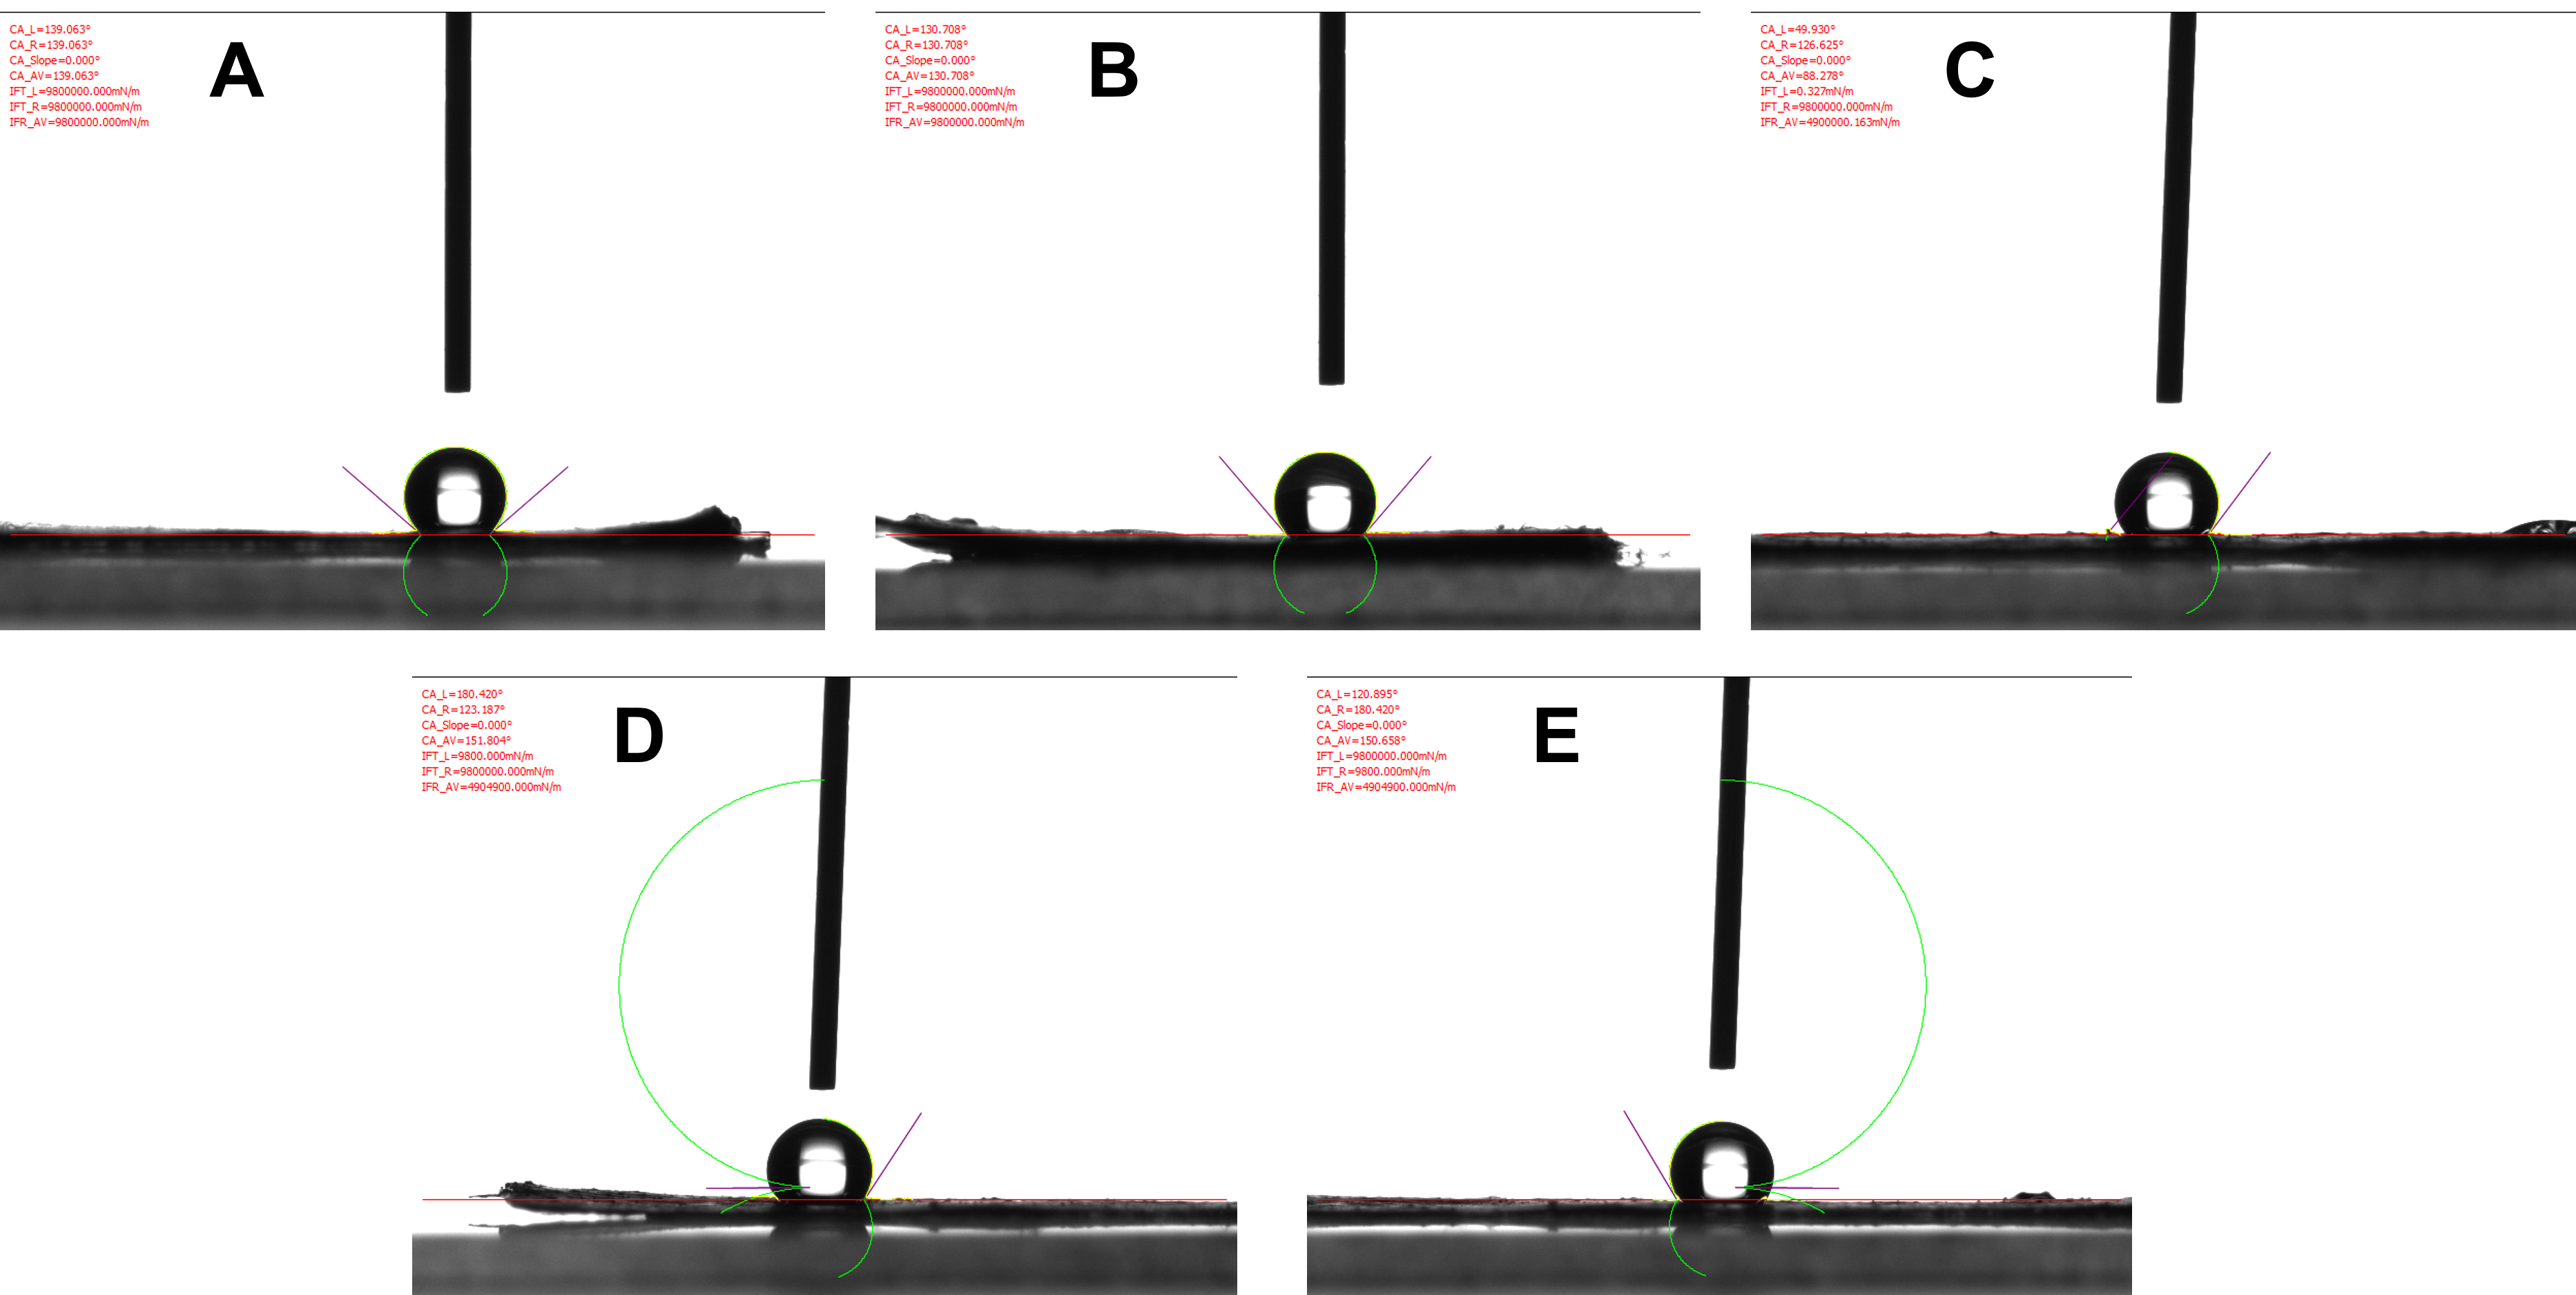


**Supplemental figure 2.** Water contact angle of (A) PCL, (B) 0.1%GO/PCL, (C) 0.3%GO/PCL, (D) 0.5%GO/PCL, (E) 1.0%GO/PCL.

**Abbreviations:** GO, Graphene oxide; PCL, Polycaprolactone.

**Supplemental figure 3**


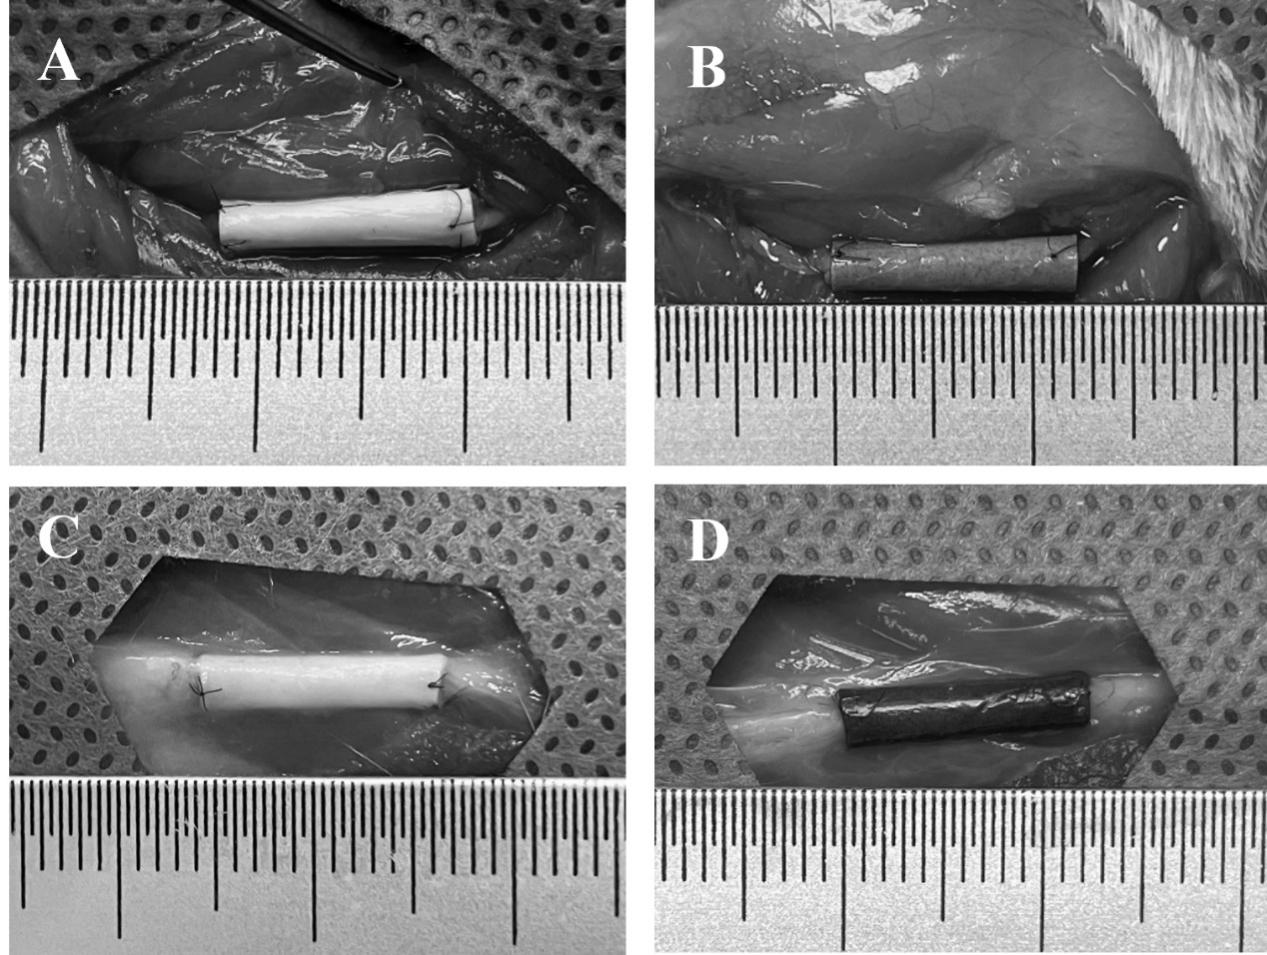


**Supplemental figure 3.** General observation of regenerated nerve tissues after surgical implantation.

**Notes:** (A, B) 0 day following repair and (C, D) 12 weeks following repair. (A, C) PCL scaffold. (B, D) GO/PCL scaffold.

**Abbreviations:** GO, Graphene oxide; PCL, Polycaprolactone.
